# Supplementary material
Source: PubMed Central journal article supplement (PMC5452021)
Supplement: EMBR-18-1027-s001.pdf [file EMBR-18-1027-s001.pdf]

## Expanded View Figures

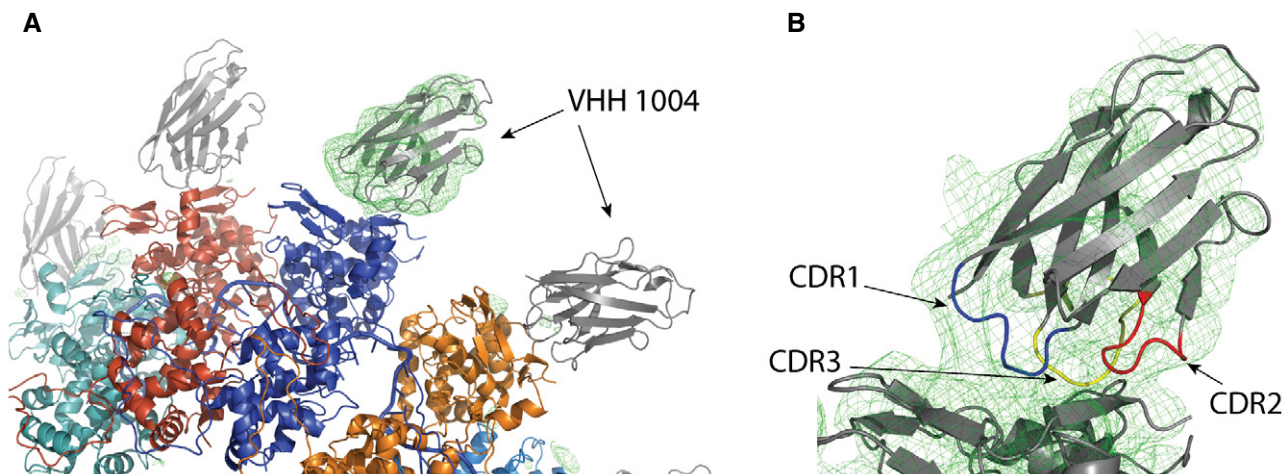

**Figure EV1. VHH omit map (A) and composite omit map (B) shown for VHH 1004 in complex with N-RNA.**

A Side view of the N-RNA 10-mer with VHH 1004 bound (gray). N molecules are shown in different colors. The electron density shown is from a Sigma-A-weighted difference (mFo-DFc) omit map for the centered VHH contoured at  $2.7\sigma$  (green mesh).

B Magnified view of the interaction interface of VHH 1004 and VSV N. Composite omit map (2mFo-DFc) was calculated and is shown at  $1.2\sigma$  (green mesh). The complementary determining regions (CDRs) of VHH 1004 are shown in blue (CDR1), red (CDR2), and yellow (CDR3).

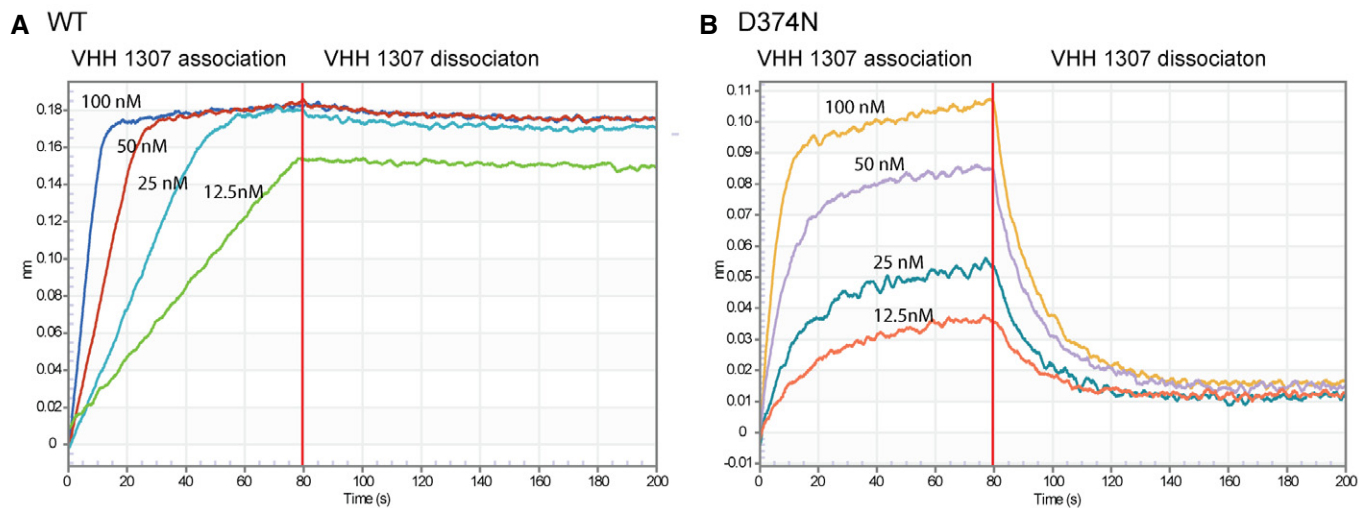

**Figure EV2. Binding affinity determination for VHH 1307.**

A, B Octet RED96 sensorgrams with immobilized VSV N WT (A) or D374N (B). VHH 1307 association and dissociation are shown for VHH concentrations of 12.5–100 nM.
